# Supplementary material for: Inhibition of Candida albicans Biofilm Formation by the Synthetic Lactoferricin Derived Peptide hLF1-11
Source: PubMed Central journal article supplement (PMC5130267; doi:10.1371/journal.pone.0167470), 2016-11-30
Supplement: pone.0167470.s001.pdf [file pone.0167470.s001.pdf]

**S1 Table**

| <b>Gene</b>  | <b>Forward primer (5'-3')</b> | <b>Reverse primer (5'-3')</b> | <b>Amplified product length (bp)</b> |
|--------------|-------------------------------|-------------------------------|--------------------------------------|
| <i>ACT 1</i> | TAGGTTTGAAGCTGCTGG            | CCTGGGAACATGGTAGTAC           | 124                                  |
| <i>ALS 3</i> | GGTATCGTCCATTTGTTGA           | TTCTGTATCCAGTCCATCTT          | 139                                  |
| <i>CYR 1</i> | GTTTCCCCCACCCTCA              | TTGCGGTAATGACACAACAGA         | 114                                  |
| <i>ECE 1</i> | ACAGTTTCCAGGACGCCAT           | ATTGTTGCTCGTGTTGCCA           | 140                                  |
| <i>EFG 1</i> | TTGAGATGTTGCGGCAGGATA         | ACTGGACAGACAGCAGGAC           | 99                                   |
| <i>GSC 1</i> | CCCATTCTCTAGGCACGA            | ATCAACAACCACTTGCTTCG          | 117                                  |
| <i>HST 7</i> | GCCAGTATGGTCGGAGGAT           | ACATAGGCATCGTCTTCGTC          | 67                                   |
| <i>HWP 1</i> | ACAGGTAGACGGTCAAGG            | GGGTAATCATCACATGGTTC          | 87                                   |
| <i>RAS 1</i> | GAGGTGGTGGTGTGGTA             | TTCTTCTTGTCCAGCAGTATC         | 161                                  |
| <i>TEC 1</i> | GCACTGGCTTCAAGCTCAA           | GCTGCTGCACTCAAGTTCTG          | 137                                  |
| <i>ZAPI</i>  | ATCTGTCCAGTGTTGTTTGA          | AGGTCTCTTTGAAAGTTGTG          | 131                                  |
| <i>ADH5</i>  | ACCTGCAAGGGCTCATTCTG          | CGGCTCTCAACTTCTCCATA          | 139                                  |
| <i>CSH1</i>  | CGTGAGGACGAGAGAGAAT           | CGAATGGACGACACAAAACA          | 100                                  |
