# Supplementary material for: Inhibition of Candida albicans Biofilm Formation by the Synthetic Lactoferricin Derived Peptide hLF1-11
Source: PubMed Central journal article supplement (PMC5130267; doi:10.1371/journal.pone.0167470), 2016-11-30

S1 Fig

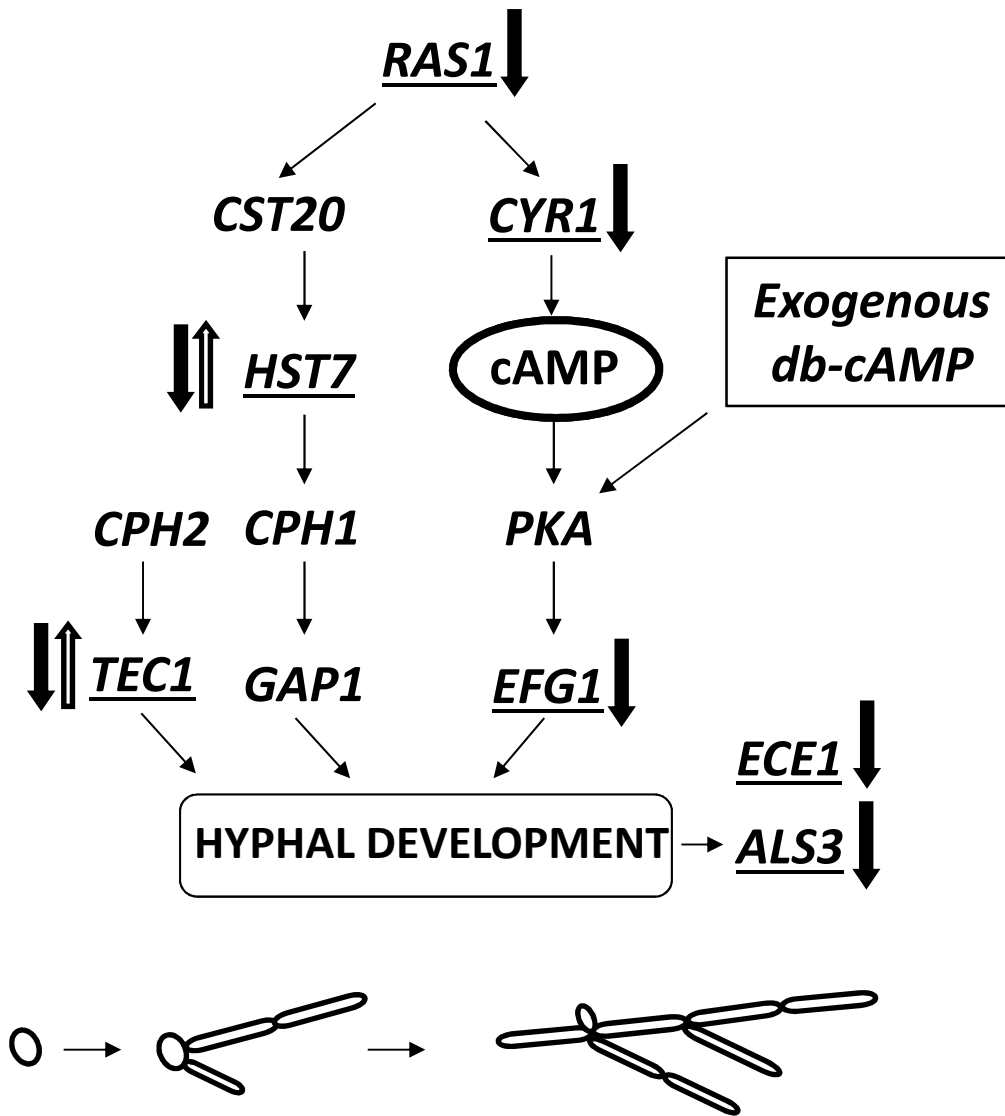

Supplement: pone.0167470.s002.pdf [file pone.0167470.s002.pdf]
